# Supplementary material for: Large-Scale Determination of Sequence, Structure, and Function Relationships in Cytosolic Glutathione Transferases across the Biosphere
Source: PubMed Central journal article supplement (PMC3995644; doi:10.1371/journal.pbio.1001843), 2014-04-22

# Distribution of cytGST lengths

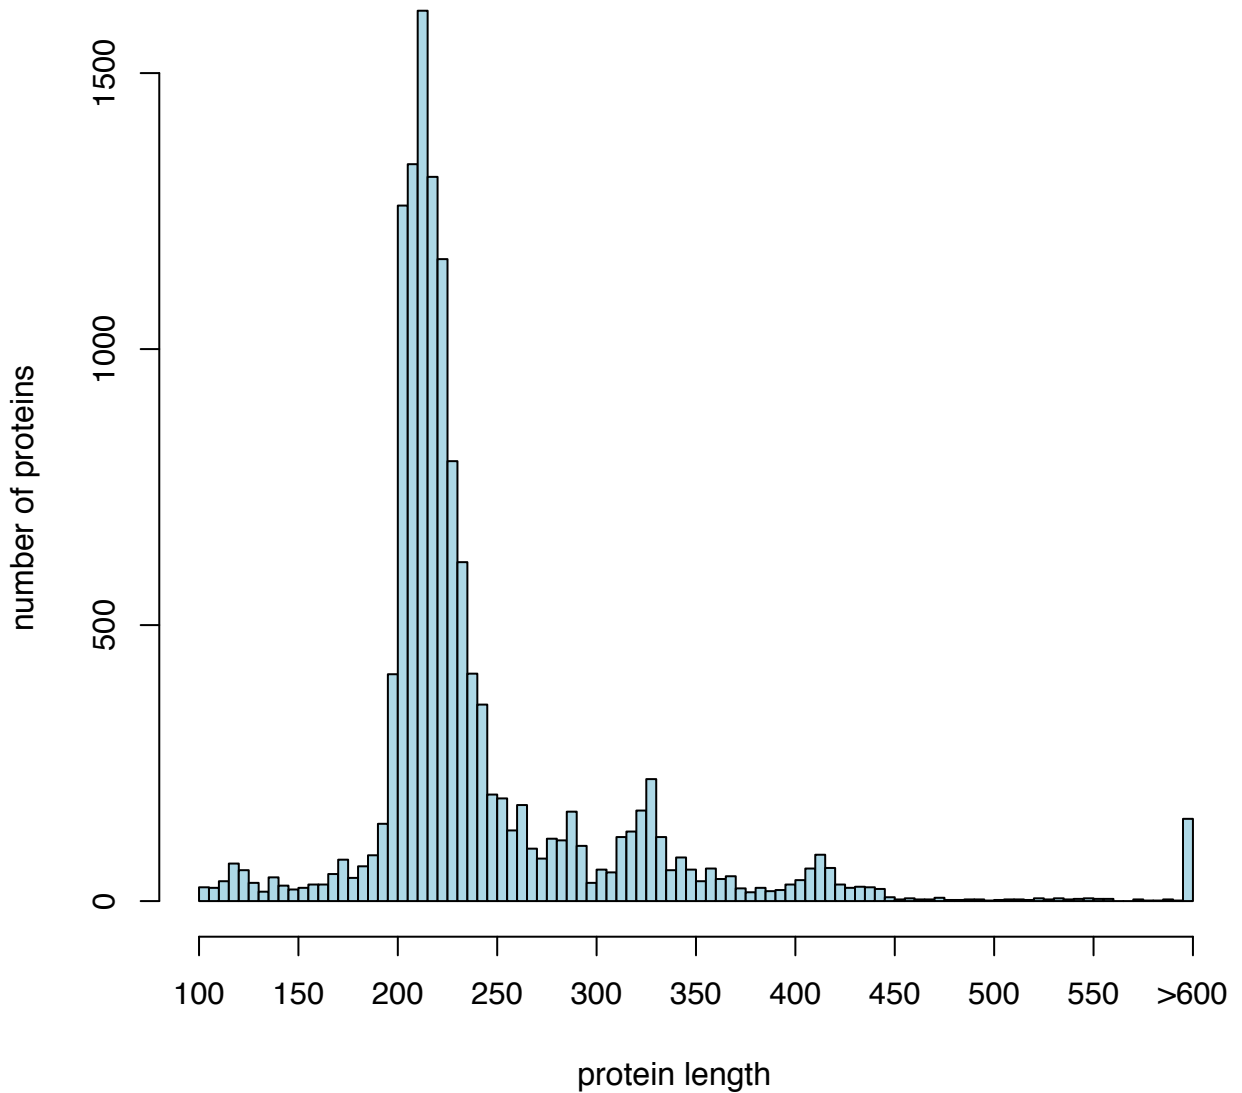

Supplement: pbio.1001843.s001.pdf [file pbio.1001843.s001.pdf]
