# Supplementary material for: Large-Scale Determination of Sequence, Structure, and Function Relationships in Cytosolic Glutathione Transferases across the Biosphere
Source: PubMed Central journal article supplement (PMC3995644; doi:10.1371/journal.pbio.1001843), 2014-04-22
Supplement: pbio.1001843.s004.pdf [file pbio.1001843.s004.pdf]

|                                     |        |                    |                            |                                  |    |
|-------------------------------------|--------|--------------------|----------------------------|----------------------------------|----|
| 1A0F A_E2KU21_Main.1/1-201          | 3 LF   | -----YKP-----      | GACSLASHITLRES-----        | GKD--FTLVSV--DLMKKR-----         | 36 |
| A9CII7_Main.1/1-208                 | 6 FY   | -----TNP-----      | MSRGR I ARWML EEV-----     | GIP--YKTEIL--GFETS-----          | 38 |
| A9CJU4_Main.1/1-219                 | 4 IY   | -----GVYR-----     | -SRATRTLWLAAEL-----        | GIE--FKHVPV--IQARRLADPLA----     | 42 |
| A9CJU5_Main.1/1-206                 | 4 LF   | -----FSP-----      | GSCSRASHIVLEES-----        | GLP--YKAHRV--NFAEGE-----         | 37 |
| A9CLG1_Main.1/1-203                 | 4 LF   | -----HAPR-----     | -SRSTRIVTLLRELD----        | AIDK--VAIKIV--DITRGD-----        | 39 |
| Q7D3T0_Main.1/1-211                 | 3 LY   | -----YMP-----      | AACSLSPHIVANEL-----        | ELD--IEFVRV--NFKDHK-----         | 36 |
| 3C8E A_YghU_D6JFD2_Main.2/1-284     | 43 LY  | -----SLG-----      | TPNGQKVTIMLEELLALGVTGAE--  | YDAWL I--RIGDGD-----             | 82 |
| 3G6X A_YfcG_E7ICS5_Main.2/1-204     | 4 LY   | -----FAP-----      | TPNGHKITL FLEEA-----       | ELD--YRLIKV--DLGKGG-----         | 37 |
| 1G6W A_E7KHF2_Main.2/1-234          | 17 LF  | -----SHRS-----     | APNGFKVAIVLSEL-----        | GFH--YNTIFL--DFNLGE-----         | 51 |
| 4ECI A_Q02KA8_Main.2/1-204          | 5 LY   | -----TAA-----      | TPNGHKVSI ALEEM-----       | GLP--YRVHAL--SFDKKE-----         | 38 |
| 4IKH A_Q4KED9_Main.2/1-227          | 19 LY  | -----SLP-----      | TPNGVKVSI MLEEI-----       | GLP--YEHRV--SFETQD-----          | 52 |
| Q03L82_Main.2/1-262                 | 45 LY  | -----TFP-----      | TPNGIKATIMLEELKELGVTQAG--  | YDAYRI--KIGDGD-----              | 84 |
| Q8DTN7_Main.2/1-263                 | 45 VY  | -----SLG-----      | TPNGLKVAVML EELRELGVKEAD-- | YDLFKI--SIMDGD-----              | 84 |
| A6B5E9_Main.2/1-285                 | 46 LY  | -----SMG-----      | TPNGQKVTIMFEELLAAGVKEAE--  | YDAYLI--KIGDGD-----              | 85 |
| Q2RXK8_Main.2/1-229                 | 4 LY   | -----YWP-----      | TPNGFKISILLEEL-----        | GQP--YTLKPV--NIAKGE-----         | 37 |
| Q4KH85_Main.2/1-213                 | 4 LY   | -----YWT-----      | TPNGHKISL FLEEA-----       | GLP--YTLYPV--NIGLGE-----         | 37 |
| 1EEM A_P78417_Main.3/1-237          | 22 IY  | -----SMRF-----     | CPFAERTRLVLKAK-----        | GIR--HEVINI--NLK-----            | 53 |
| P34345_Main.3/1-250                 | 27 VY  | -----NMRF-----     | CPWAERAML YVAAK-----       | GIE--AEVVNL--NVT-----            | 58 |
| Q2KDI2_Main.3/1-227                 | 6 LI   | -----SHHL-----     | CPYVQRAAIALREK-----        | GVP--FERINI--DLA-----            | 37 |
| Q8XW81_Main.3/1-224                 | 8 LI   | -----SHPL-----     | CPFVQRAAIVLLEK-----        | GVP--FERINV--DLA-----            | 39 |
| Q9H4Y5_Main.3/1-243                 | 26 IY  | -----SMRF-----     | CPYSHRTRLVLKAK-----        | DIR--HEVNI--NLR-----             | 57 |
| Q9VSL2_Main.3/1-241                 | 24 LY  | -----SMRF-----     | CPYAQRAHLVLNAK-----        | NVP--YHSVI--NLT-----             | 55 |
| Q9VSL3_Main.3/1-243                 | 24 LY  | -----SMRF-----     | CPFAQRVHLVLD AK-----       | KIP--YHSIYI--NLT-----            | 55 |
| Q9VSL4_Main.3/1-250                 | 25 YY  | -----SMRF-----     | CPYSQRAGLVLA AK-----       | KIP--HHTVYI--DLS-----            | 56 |
| Q9VSL5_Main.3/1-251                 | 25 FF  | -----SMAF-----     | CPF SHRVR LMLAAK-----      | HIE--HHKIYV--DLI-----            | 56 |
| Q9VSL6_Main.3/1-254                 | 24 LY  | -----SMRF-----     | CPYAHRVHLVLD AK-----       | KIP--YHAIYI--NLR-----            | 55 |
| 4HI7 A_B4KM86_Main.4/1-220          | 4 LY   | -----GIDA-----     | SPPVRAVKLT LAAL-----       | QLP--YDYKIV--NLMNKE-----         | 38 |
| 3R2Q A_B3HZI4_Main.9_NO_DSBR/1-202  | 3 LV   | -----GSYT-----     | SPFVRKLSILLEEK-----        | GIT--FEFINE--LPY-----            | 34 |
| A9CJG4_Main.9/1-198                 | 3 LL   | -----YSPA-----     | SPYSAKVRMAARHL-----        | DID--VTSV--RVDTN-----            | 34 |
| 2R4V A_O15247_Main.10_NO_DSBR/1-226 | 7 LF   | -----VKAGSDGESIGNC | Y PFCQRLFMILWLK-----       | GVK--FNVTTV-----                 | 43 |
| Q8LE52_Main.10/1-258                | 51 IC  | VKASITTPNKLGD----- | CPFCQKVL LTMEEK-----       | NVP--YDMKMV--DLS-----            | 91 |
| Q9FRL8_Main.10/1-213                | 5 IC   | VKVAVGAPDVLGD----- | CPFSQRVLLTLEEK-----        | KLP--YKTHLI--NVS-----            | 45 |
| Q9FWR4_Main.10/1-213                | 5 IC   | VKAAVGAPDHLGD----- | CPFSQRALLTLEEK-----        | SLT--YKIHLI--NLS-----            | 45 |
| Q88LB2_Main.14/1-199                | 5 LY   | -----SFRR-----     | CPWAMRARLALRYA-----        | GCE--VEIC--EVAMK-----            | 36 |
| Q129E0_Main.14/1-230                | 16 LY  | -----SFRR-----     | CPYAMRARLALVVS-----        | GQR--CELR--EVVLR-----            | 47 |
| A9CKF2_Main.15/1-230                | 4 LY   | -----HSPM-----     | STASRFVRLILA EY-----       | GFQ--TDLVEE--QPW-----            | 35 |
| 2YCD A_A9CFJ9_Main.25/1-213         | 8 VFER | ---SPDGGRG-----    | LARDMPVRWALEEV-----        | GQP--YHVRRL--SFEA-----           | 45 |
| B8H2E2_Main.25/1-217                | 7 AYNW | ---VPPPARG-----    | LVRDLRIRWALEEL-----        | GRP--YAVETV--LH-----             | 42 |
| B7UV05_Main/1-220                   | 5 LY   | -----GAPL-----     | SPFVRKVRLLLA EK-----       | GLD--YQLEAI--APF-----            | 36 |
| 1G7O A_B3BP81_R4.1/1-215            | 3 LY   | -----IYDH-----     | CPYCLKARMI FGLK-----       | NIP--VELHVL--LND-----            | 34 |
| D0W558_R4.1/1-213                   | 3 LY   | -----IYDH-----     | CPFCVRARMAAGLF-----        | GAD--VEEVVM--AND-----            | 34 |
| 3PPU A_YqjG_B3VQJ7_Xi.1/1-314       | 43 LY  | -----VSYA-----     | CPWATR TL I VRK LK-----    | GLEDFIGVTVVSPRMSGNWP FANVD PF    | 90 |
| 3R3E A_C4ZR18_Xi.1/1-308            | 38 LY  | -----VSLA-----     | CPWAHRTLIMRKLK-----        | GLEPFI SVSVVNPLML ENGWTFDD SFP G | 85 |
| C7GXD4_Xi.1/1-370                   | 40 LY  | -----VSLA-----     | CPWAHRTLITRALK-----        | GLTSVIGC SVVHWHLDEK GWRFLDMEKQ   | 87 |
| P48239_Xi.1/1-356                   | 25 IY  | -----GALG-----     | CPFTHRAILARSLK-----        | KLEPVLGLVL SHWQLDSKGARFL PAPHR   | 72 |
| Q04806_Xi.1/1-366                   | 40 LY  | -----VALP-----     | CPWAQRTLITRALK-----        | GLAPIIGC SVAHWHLDDKGWRFL EEDG    | 87 |

|                                    |    |            |                          |                   |                    |                 |             |                 |               |       |     |
|------------------------------------|----|------------|--------------------------|-------------------|--------------------|-----------------|-------------|-----------------|---------------|-------|-----|
| 1A0F A_E2KU21_Main.1/1-201         | 37 | -----L     | ENGDDYFAVNP              | -----             | KGQ                | 51              |             |                 |               |       |     |
| A9CII7_Main.1/1-208                | 39 | -----      | MKSPAYRLINP              | -----             | MAK                | 52              |             |                 |               |       |     |
| A9CJU4_Main.1/1-219                | 43 | -----      | TDAPLNTLSPAFLAVNP        | -----             | MGT                | 62              |             |                 |               |       |     |
| A9CJU5_Main.1/1-206                | 38 | -----      | QRSEAFLLKINP             | -----             | KGR                | 51              |             |                 |               |       |     |
| A9CLG1_Main.1/1-203                | 40 | -----      | GSGRKDPKLNHP             | -----             | EGK                | 54              |             |                 |               |       |     |
| Q7D3T0_Main.1/1-211                | 37 | -----      | TEGGQDYDINP              | -----             | NGY                | 51              |             |                 |               |       |     |
| 3C8E A_YghU_D6JFD2_Main.2/1-284    | 83 | -----      | QFSSGFVEVNP              | -----             | NSK                | 96              |             |                 |               |       |     |
| 3GX0 A_YfcG_E7ICSS_Main.2/1-204    | 38 | -----      | QFRPEFLRISP              | -----             | NNK                | 51              |             |                 |               |       |     |
| 1G6W A_E7KHF2_Main.2/1-234         | 52 | -----      | HRAPEFVSVNP              | -----             | NAR                | 65              |             |                 |               |       |     |
| 4ECI A_Q02KA8_Main.2/1-204         | 39 | -----      | QKAPEFLRINP              | -----             | NGR                | 52              |             |                 |               |       |     |
| 4IKH A_Q4KED9_Main.2/1-227         | 53 | -----      | QMTPEFLSVSP              | -----             | NNK                | 66              |             |                 |               |       |     |
| Q03L82_Main.2/1-262                | 85 | -----      | QFGSDFVAINP              | -----             | NSK                | 98              |             |                 |               |       |     |
| Q8DTN7_Main.2/1-263                | 85 | -----      | QFGSDFVAINP              | -----             | NSK                | 98              |             |                 |               |       |     |
| A6B5E9_Main.2/1-285                | 86 | -----      | QFGSGFVAVNP              | -----             | NSK                | 99              |             |                 |               |       |     |
| Q2RXK8_Main.2/1-229                | 38 | -----      | QFAPEFLAISP              | -----             | NNR                | 51              |             |                 |               |       |     |
| Q4KH85_Main.2/1-213                | 38 | -----      | QFKPEFLKIA               | -----             | NNR                | 51              |             |                 |               |       |     |
| 1EEM A_P78417_Main.3/1-237         | 54 | -----      | NKPEWFFKKNP              | -----             | FGL                | 67              |             |                 |               |       |     |
| P34345_Main.3/1-250                | 59 | -----      | DKLEWYWKHY               | -----             | QGK                | 72              |             |                 |               |       |     |
| Q2KDI2_Main.3/1-227                | 38 | -----      | NKPDWFLEISP              | -----             | LGK                | 51              |             |                 |               |       |     |
| Q8XW81_Main.3/1-224                | 40 | -----      | AKPDWFLALSP              | -----             | TGK                | 53              |             |                 |               |       |     |
| Q9H4Y5_Main.3/1-243                | 58 | -----      | NKPEWYTKHP               | -----             | FGH                | 71              |             |                 |               |       |     |
| Q9VSL2_Main.3/1-241                | 56 | -----      | EKPEWLVEVSP              | -----             | LLK                | 69              |             |                 |               |       |     |
| Q9VSL3_Main.3/1-243                | 56 | -----      | DKPEWLLKPNP              | -----             | QGK                | 69              |             |                 |               |       |     |
| Q9VSL4_Main.3/1-250                | 57 | -----      | EKPEWYIDYSP              | -----             | LGK                | 70              |             |                 |               |       |     |
| Q9VSL5_Main.3/1-251                | 57 | -----      | EKPEWYKDFSP              | -----             | LGK                | 70              |             |                 |               |       |     |
| Q9VSL6_Main.3/1-254                | 56 | -----      | DKPEWFSLVSS              | -----             | STK                | 69              |             |                 |               |       |     |
| 4HI7 A_B4KM86_Main.4/1-220         | 39 | -----      | QHSEEYLKKNP              | -----             | QHT                | 52              |             |                 |               |       |     |
| 3R2Q A_B3HZI4_Main.9_NO_DSB/1-202  | 35 | -----      | NADNGVAQFNP              | -----             | LGK                | 48              |             |                 |               |       |     |
| A9CJG4_Main.9/1-198                | 35 | -----      | AEPATLMDNPNP             | -----             | LGK                | 48              |             |                 |               |       |     |
| 2R4V A_O15247_Main.10_NO_DSB/1-226 | 44 | -----      | -----DMTP                | -----             | GTN                | 50              |             |                 |               |       |     |
| Q8LE52_Main.10/1-258               | 92 | -----      | NKPEWFLKISP              | -----             | EGK                | 105             |             |                 |               |       |     |
| Q9FRL8_Main.10/1-213               | 46 | -----      | DKPQWFLDISP              | -----             | EGK                | 59              |             |                 |               |       |     |
| Q9FWR4_Main.10/1-213               | 46 | -----      | DKPQWFLDISP              | -----             | QGK                | 59              |             |                 |               |       |     |
| Q88LB2_Main.14/1-199               | 37 | -----      | NKPAELLALSP              | -----             | KGT                | 50              |             |                 |               |       |     |
| Q129E0_Main.14/1-230               | 48 | -----      | SKPPEMLAASS              | -----             | KGT                | 61              |             |                 |               |       |     |
| A9CKF2_Main.15/1-230               | 36 | -----      | ERRREFLALNP              | -----             | AGT                | 49              |             |                 |               |       |     |
| 2YCD A_A9CFJ9_Main.25/1-213        | 46 | -----      | MKEASHLAYQP              | -----             | FGQ                | 59              |             |                 |               |       |     |
| B8H2E2_Main.25/1-217               | 43 | -----      | QDKTAYRAKQP              | -----             | FGQ                | 56              |             |                 |               |       |     |
| B7UV05_Main/1-220                  | 37 | -----      | GQPAWYREISP              | -----             | LGR                | 50              |             |                 |               |       |     |
| 1G7O A_B3BP81_R4.1/1-215           | 35 | -----      | DAETPTRMVG               | -----             | QKQ                | 47              |             |                 |               |       |     |
| D0W558_R4.1/1-213                  | 35 | -----      | DEATPIGMIG               | -----             | AKQ                | 47              |             |                 |               |       |     |
| 3PPU A_YqjG_B3VQJ7_Xi.1/1-314      | 91 | P-----     | AADSDPLNNAQHVKDLYLKVKPDY | -----             | DGRFT              | 120             |             |                 |               |       |     |
| 3R3E A_C4ZR18_Xi.1/1-308           | 86 | -----      | ATGDTLYQNEFLYQLYLHADPHY  | -----             | SGRVT              | 113             |             |                 |               |       |     |
| C7GXD4_Xi.1/1-370                  | 88 | LEDSEDFL   | EHWHDVAGGI               | RTAKEDSSKSFAEIKND | SQRFMVDATNEPHYGYKR | ISDLYYKSDPQY    | SARFT       | 157             |               |       |     |
| P48239_Xi.1/1-356                  | 73 | PEKYKERFFT | ATGGIASAKL               | -----             | DESEELGDVNND       | SARLFVDGAFDPVEN | ISRLSELYYLN | PKYPGTFKFT      | 140           |       |     |
| Q04806_Xi.1/1-366                  | 88 | KTNERHWFD  | IAGGI                    | SSVNL             | -----              | NTSTPVAN        | IPNNAHRL    | LLVDGTDEPHYGYKR | RLSDFYFKTKPDY | KGRFT | 153 |



|                                    |                                                                                                                                                                 |
|------------------------------------|-----------------------------------------------------------------------------------------------------------------------------------------------------------------|
| 1A0F A_E2KU21_Main.1/1-201         | 104 ELHKG F - TPLFRPD - - - - - TP - - - - - EEYKPTVRAQLEK 131                                                                                                  |
| A9CII7_Main.1/1-208                | 102 PLEMAA - SMKAMGF - - - - - EVPK - - - - - EKLRMAGCGSYAD 131                                                                                                 |
| A9CJU4_Main.1/1-219                | 112 E I ETNS - LKISSAI - - - - - AEGLAESDA - - - - - GKAVIDVAARLLKR 147                                                                                         |
| A9CJU5_Main.1/1-206                | 103 TVHVAH - AHGRRGS - - - - - RWANEDSSL - - - - - ADMKARVPKNMGE 137                                                                                            |
| A9CLG1_Main.1/1-203                | 106 VVEPVL - IMQAAGI - - - - - - - - - - SHPFVDFTFRSPAE 132                                                                                                     |
| Q7D3T0_Main.1/1-211                | 104 E I H K G F - I P L L Y A K - - - - - Q A - - - - - G A Y L E T A T P K L E K 131                                                                           |
| 3C8E A_YghU_D6JFD2_Main.2/1-284    | 149 A - APFLGGGFGHFY - - - - - HYAP - VKI - - - - - EYAINRFTMEAKR 181                                                                                           |
| 3GX0 A_YfcG_E7ICS5_Main.2/1-204    | 107 GLGPML - GQNHFFN - - - - - HAAP - QTI - - - - - PYA I E R Y Q V E T Q R 139                                                                                 |
| 1G6W A_E7KHF2_Main.2/1-234         | 123 GHAPMI - GQALHFR - - - - - YFHS - QKI - - - - - ASAVERYTDEVRR 155                                                                                           |
| 4ECI A_Q02KA8_Main.2/1-204         | 104 GVGPMQ - GQANVFF - - - - - RYFP - EKL - - - - - QGAIDRYQHETRR 136                                                                                           |
| 4IKH A_Q4KED9_Main.2/1-227         | 121 G I G P M F - G Q V G F F N - - - - - K F A G R E Y E D - - - - - K R P L E R Y V N E A K R 155                                                             |
| Q03L82_Main.2/1-262                | 151 A - APFLGGGFGHFF - - - - - HYAP - EKI - - - - - EYAVNRFAMEAKR 183                                                                                           |
| Q8DTN7_Main.2/1-263                | 151 A - APFVGGGFGHFF - - - - - SYAP - EKL - - - - - EYPINRFTMETKR 183                                                                                           |
| A6B5E9_Main.2/1-285                | 152 S - APYLGGGFGHFY - - - - - AYAP - EKf - - - - - EYPINRFTMEVKR 184                                                                                           |
| Q2RXK8_Main.2/1-229                | 107 GLGPMA - GQAHHFR - - - - - QYAP - EPV - - - - - PYA I E R Y T N E V N R 139                                                                                 |
| Q4KH85_Main.2/1-213                | 107 GLGPMA - GQNHFFS - - - - - QFAP - EKI - - - - - P Y A I K R Y V D E T A R 139                                                                               |
| 1EEM A_P78417_Main.3/1-237         | 119 VPSLVG - SFIRSQN - - - - - - - - - - KEDYAGLKEEFRK 144                                                                                                      |
| P34345_Main.3/1-250                | 123 VAHAVP - LLFAVMR - - - - - - - - - - DRTLKDEKQRKVE 149                                                                                                      |
| Q2KDI2_Main.3/1-227                | 107 VLSDLW - GYETATE - - - - - - - - - - VEQL EAKRKALIA 132                                                                                                     |
| Q8XW81_Main.3/1-224                | 109 T L A D A W - Q F L N A S D - - - - - - - - - - R T T S D D K R A A F R K 134                                                                               |
| Q9H4Y5_Main.3/1-243                | 123 VPHLTK - ECLVALR - - - - - - - - - - CGRECTNLKAALRQ 149                                                                                                     |
| Q9VSL2_Main.3/1-241                | 124 I T S A F I - N I L - - - - - - - - - - V Q G T G L E D Y W T 143                                                                                           |
| Q9VSL3_Main.3/1-243                | 124 VLGAFF - - - - - - - - - - - - - - - - K A S D G G D L E P F W S 142                                                                                        |
| Q9VSL4_Main.3/1-250                | 126 AVSAIY - PVLFT - - - - - - - - - - - - - - - - K N P P A D A I K N F E T 149                                                                                |
| Q9VSL5_Main.3/1-251                | 125 VVSAIY - PVLTCN - - - - - - - - - - - - - - - - P N A P K D A I P N F E N 149                                                                               |
| Q9VSL6_Main.3/1-254                | 124 F I N A F Y - Y L L L H - - - - - - - - - - - - - - - - D N P E Q L V D T D H Y A 147                                                                       |
| 4HI7 A_B4KM86_Main.4/1-220         | 104 VVFANALRSLAKMI - - - - - LFLG - KTE - - - - - - - - - - V P Q E R T D A T T E 135                                                                           |
| 3R2Q A_B3HZI4_Main.9_NO_DSB/1-202  | 100 I M D A G L - V S V R E Q A - - - - - R P A A - Q Q S - - - - - E D E L L R Q R E K I N R 132                                                               |
| A9CJG4_Main.9/1-198                | 99 I M D C L L - A I V Y E R R - - - - - F R P E D K I H - - - - - Q P W I D K Q W S K V V R 132                                                                |
| 2R4V A_O15247_Main.10_NO_DSB/1-226 | 99 - - - - - A K F - S A Y I K - - - - - - - - - - N T Q - - - - - K E A N K N F E K S L L K 122                                                                |
| Q8LE52_Main.10/1-258               | 156 L K S - - - - - - - - - - - - - - - - - - - - - - - - - - - - - K D S G D G T E Q V L L D 171                                                               |
| Q9FRL8_Main.10/1-213               | 110 L K S - - - - - - - - - - - - - - - - - - - - - - - - - - - - - K D A N D G S E K A L V D 125                                                               |
| Q9FWR4_Main.10/1-213               | 110 L K S - - - - - - - - - - - - - - - - - - - - - - - - - - - - - K D S N D G S E H A L L V 125                                                               |
| Q88LB2_Main.14/1-199               | 102 T F K A H V - N L Y K Y A E - - - - - - - - - - R Y P - - - - - E H S R E H Y R Q Q A E A 130                                                               |
| Q129E0_Main.14/1-230               | 113 A F K R N L - D R Y K Y P N - - - - - R Y L E E A A E E T A - - - - - G D E A V F A E A H R T A G A A 152                                                   |
| A9CKF2_Main.15/1-230               | 105 K M E N D V - T R P L V R E - - - - - R V Y K L Q M T A A Q G G - - - - - G P P D S K L L R T A R N N I R Q 147                                             |
| 2YCD A_A9CFJ9_Main.25/1-213        | 108 T I E P S I - L N F T T V W - - - - - L F E R N E P W H - - - - - E A R L A R T K E Q L L K 142                                                             |
| B8H2E2_Main.25/1-217               | 105 T L E V P L - L Q L A E L N - - - - - I F S A G Q A W T - - - - - E G A R P K V E R W V R Q 139                                                             |
| B7UV05_Main/1-220                  | 102 E I A P L A - T L T I F R N - - - - - R I L K P A M G Q A C - - - - - E E N D V R R A L E E K L P A 140                                                     |
| 1G7O A_B3BP81_R4.1/1-215           | 92 K V N G Y A - N K L L L P R F A K S A F D E F S T P A A R K Y F V D K K E A S A G N F - - - - - A D L L A H S D G L I K N I S D 149                          |
| D0W558_R4.1/1-213                  | 89 K V G S Y N - N K L V Q P R T V K I G L P E F A T A E A V K Y F T D K K E K N I G S F - - - - - S A N L N K T A Q Y L D R I H E 146                          |
| 3PPU A_YqjG_B3VQJ7_Xi.1/1-314      | 180 T V N N G V - Y K S G F - - - - - A S T - - - - - - - - - - - - - - - - Q K A Y E A A V I P L F E 206                                                       |
| 3R3E A_C4ZR18_Xi.1/1-308           | 170 T V N N G V - Y K A G F - - - - - A T S - - - - - - - - - - - - - - - - Q E A Y D E A V A K V F E 196                                                       |
| C7GXD4_Xi.1/1-370                  | 218 S I N N G V - Y K T G F - - - - - - - - - - - - - - - - - - - - - - - - - - - - - A E K A E V Y E S E V N N V F E H L D K V E K I L S D K Y S K L K A K 263 |
| P48239_Xi.1/1-356                  | 202 K I N L G V - Y K V G L - - - - - - - - - - - - - - - - - - - - - - - - - - - - - A E N G K I Y E T E V K - T L F E N L Q M E C V L K E N Y K R L E E 246   |
| Q04806_Xi.1/1-366                  | 214 K I N N G V - Y K A G F - - - - - - - - - - - - - - - - - - - - - - - - - - - - - A E C A E V Y E R E V T S L F Q Y L D K L E N L L D K K Y T D L E A E 259 |

|                                     |                                                                                                                                                   |
|-------------------------------------|---------------------------------------------------------------------------------------------------------------------------------------------------|
| 1A0F A_E2KU21_Main.1/1-201          | 132 KLQYVNEALKDE - - - - - HWICGQRF T I ADAYLFTVLRWAY - - AVK - - - - - 169                                                                       |
| A9CII7_Main.1/1-208                 | 132 VMN T L E R A V S E N - - - - - R F I A G D L F T A A D V Y V G A H V G W G L - - H F - - - - - 168                                           |
| A9CJU4_Main.1/1-219                 | 148 P L R V L E Q H L A T H - - - - - D Y L V G D R F T V A D L N V A E I V R Y A Q - - G H Q - - - - - 185                                       |
| A9CJU5_Main.1/1-206                 | 138 C F E L I E H G M L H G - - - - - P W V L G T A Y S V A D P Y L F V M S G W L E - - S D G - - - - - 175                                       |
| A9CLG1_Main.1/1-203                 | 133 L A A R L E T A L K D C - - - - - P Y L M G E R Y T A V D L L L H S P F A W C P - - - - - 167                                                 |
| Q7D3T0_Main.1/1-211                 | 132 R Y A W I D N L L A S Q - - - - - R F L M G E N F T V A D A Y L F A L T S W G Q - - A S W L K S Y Y G - - - - - A D 177                       |
| 3C8E A_YghU_D6JFD2_Main.2/1-284     | 182 L L D V L D K Q L A Q H - - - - - K F V A G D E Y T I A D M A I W P W F G N V V - L G G V Y D A A E - - - - - F 226                           |
| 3GX0 A_YfcG_E7ICS5_Main.2/1-204     | 140 L Y H V L N K R L E N S - - - - - P W L G G E N Y S I A D I A C W P W N A W T - - R Q - - - - - R 177                                         |
| 1G6W A_E7KHF2_Main.2/1-234          | 156 V Y G V V E M A L A E - - - - - R R E A L V M E L D D Y P V L V G D K L T I A D L A F V P W N V V D - - R I - - - - - G 205                   |
| 4EC A_Q02KA8_Main.2/1-204           | 137 L Y E V L D G R L G E A - - - - - E Y L A G - D Y S I A D I A T Y P W V R I H D - - W S - - - - - G 173                                       |
| 4IKH A_Q4KED9_Main.2/1-227          | 156 L L G V L D K H L G G R - - - - - E W I M G E R Y T I A D I A T F P W I R N L I - - G F Y E A G E - - - - - L 198                             |
| Q03L82_Main.2/1-262                 | 184 Q L D L L D K E L A T K - - - - - P Y I S G D E Y T I A D I A I W S W Y G R L A Q D K I W D K A G I - - - - - F 229                           |
| Q8DTN7_Main.2/1-263                 | 184 Q L D L L N K E L A N K - - - - - P Y I A G E D Y T I A D I A I W S W Y G R L A Q D A L Y E G A Y K - - - - - F 229                           |
| A6B5E9_Main.2/1-285                 | 185 Q L D V L D K R L A N N - - - - - A F L G G D E Y S I A D I A T W P W Y G N L V - L G R A Y D A A E - - - - - F 229                           |
| Q2RXK8_Main.2/1-229                 | 140 L Y G V M N K R L A D R - - - - - D Y L A G - A Y S I A D M A S W P W V V S H A - - N Q - - - - - G 176                                       |
| Q4KH85_Main.2/1-213                 | 140 L Y G V L D R R L A D R - - - - - K F V A G S D Y S I A D M A I Y P W I A S Y K - - K Q - - - - - S 177                                       |
| 1EEM A_P78417_Main.3/1-237          | 145 E F T K L E E V L T N - - - - - K K T - - - - - T F F G G N S I S M I D Y L I W P W F E R L E - - A M K L - - - - - N 186                     |
| P34345_Main.3/1-250                 | 150 V L K Q A E N L L A N - - - - - D F Y A G S Q P G Y P D Y L S F P F F E K I W - - W S A S L D G V V D L P T I E F 199                         |
| Q2KDI2_Main.3/1-227                 | 133 K F A T L E G V L A D G - - - - - P Y F S G S S F S L V D A V F A P I F R Y F D - - V F E R L G D - - - - - S 175                             |
| Q8XW81_Main.3/1-224                 | 135 K L Q Q L E K A V A A E - - - - - P Y F S G S T F S M V D A V Y A P L F R Y F D - - I L D P K V S - - - - - Q 177                             |
| Q9H4Y5_Main.3/1-243                 | 150 E F S N L E E I L E Y - - - - - Q N T - - - - - T F F G G T C I S M I D Y L L W P W F E R L D - - V Y G I - - - - - L 191                     |
| Q9VSL2_Main.3/1-241                 | 144 A L D I F E E E L T K - - - - - R G T - - - - - P Y F G G N K P G F V D Y M I W P W F E R L S - - V I E L K L Q K E - - - - - Y N 191         |
| Q9VSL3_Main.3/1-243                 | 143 G L D I Y E R E L A R - - - - - R G T - - - - - E F F G G E Q T G I L D Y M I W P W C E R L E - - L L K L Q R G E D - - - - - Y N 190         |
| Q9VSL4_Main.3/1-250                 | 150 A L D V F E Q E I T K - - - - - R G T - - - - - P Y F G G N K I G I A D Y M I W P W F E R F P - - A L K Y T L D E P - - - - - Y E 197         |
| Q9VSL5_Main.3/1-251                 | 150 A L D V F E V E L G K - - - - - R G T - - - - - P Y F A G Q H I G I V D Y M I W P W F E R F P - - S M K I N T E Q K - - - - - Y E 197         |
| Q9VSL6_Main.3/1-254                 | 148 G L V V Y E E E L K R - - - - - R C T - - - - - K F F G G D S P G M L D Y M M W P W C E R F D - - S L K Y T F E Q K - - - - - F E 195         |
| 4HI7 A_B4KM86_Main.4/1-220          | 136 A Y D F V E A F K D Q - - - - - T Y V A G N Q L T I A D F S L I S S I S S L V - - A F - - - - - V 173                                         |
| 3R2Q A_B3HZI4_Main.9_NO_DSBR/1-202  | 133 S L D V L E G Y L V D - - - - - G T L K T D T V N L A T I A I A C A V G Y L N - - F R R V A - - - - - P 172                                   |
| A9CJG4_Main.9/1-198                 | 133 G L D H L N A N L P - - - - - - K T G K K L H G G H F A L A A M I G Y L D - - L R F A G - - - - - 168                                         |
| 2R4V A_O15247_Main.10_NO_DSBR/1-226 | 123 E F K R L D D Y L N T P L L D E I D P D S A E E P P V S R R L F L D G D Q L T L A D C S L L P K L N I I K - - V A A K K Y R D - - - - - F 184 |
| Q8LE52_Main.10/1-258                | 172 E L T T F N D Y I K D N - - - - - G P F I N G E K I S A A D L S L A P K L Y H M K - - I A L G H Y K N - - - - - W 216                         |
| Q9FRL8_Main.10/1-213                | 126 E L E A L E N H L K T - - - - - H S G - - - - - P F V A G E K I T A V D L S L A P K L Y H L E - - V A L G H Y K N - - - - - W 171             |
| Q9FWR4_Main.10/1-213                | 126 E L E A L E N H L K S - - - - - H D G - - - - - P F I A G E R V S A V D L S L A P K L Y H L Q - - V A L G H F K S - - - - - W 171             |
| Q88LB2_Main.14/1-199                | 131 W L A E L E G L L A G R - - - - - A Y L L A D H P S M A D A A L L P L M R Q F A - - G V E P Q W - - - - - 171                                 |
| Q129E0_Main.14/1-230                | 153 W L G R L E L M L E Q H - - - - - G C L F G A Q A S L A D M A L L P F V R Q F A - - H T D A A W - - - - - 193                                 |
| A9CKF2_Main.15/1-230                | 148 H I K Y L E W L A G S R - - - - - T W L A G D R L S Y A D L A A A A G V S V L D - - Y L G E - - - - - 186                                     |
| 2YCD A_A9CFJ9_Main.25/1-213         | 143 R L D E L S A W L G D R - - - - - E W L E G - S F S A A D I L M I C V L R R L E - - S S - - - - - 178                                         |
| B8H2E2_Main.25/1-217                | 140 R L G Q L A A R L G D K - - - - - T Y L D G E T F T A G D L L V A D V L R Q A P - - D A M L - - - - - 178                                     |
| B7UV05_Main.1/1-220                 | 141 H F D Y L E N H L D G R - - - - - A F F V G E R L T L A D L A I A S Q L V N L R - - H A G E - - - - - N 180                                   |
| 1G7O A_B3BP81_R4.1/1-215            | 150 D L R A L D K L I V K - - - - - P N A V N G E L S E D D I Q L F P L L R N L T - - L V A - - - - - G 187                                       |
| D0W558_R4.1/1-213                   | 147 D L N D L D G L M H E V - - - - - S D G I N G E I G M E D I L I F P I L R N L T - - V V R - - - - - G 185                                     |
| 3PPU A_YqjG_B3VQJ7_Xi.1/1-314       | 207 S L D R L E K M L E G Q - - - - - D Y L I G G Q L T E A D I R L F V T I V R F D - - P V Y V T H F K C - - - - - N L 252                       |
| 3R3E A_C4ZR18_Xi.1/1-308            | 197 S L A R L E Q I L G Q H - - - - - R Y L T G N Q L T E A D I R L W T T L V R F D - - P V Y V T H F K C - - - - - D K 242                       |
| C7GXD4_Xi.1/1-370                   | 264 Y G E E D R Q K I L G E - - - - - F F T V G D Q L T E A D I R L Y T T V I R F D - - P V Y V Q H F K C - - - - - N F 309                       |
| P48239_Xi.1/1-356                   | 247 Q F S G N K Q K I L A K - - - - - Y F V L G Q R L T E A D I R L Y P S I I R F D - - V V Y V Q H F K C - - - - - N L 292                       |
| Q04806_Xi.1/1-366                   | 260 Y G K N N K D K I L D R - - - - - Y F A I G D T L T E A D I R L Y P T I V R F D - - V V Y H Q H F K C - - - - - N L 305                       |

|                                     |                                                                                                                   |     |
|-------------------------------------|-------------------------------------------------------------------------------------------------------------------|-----|
| 1A0F A_E2KU21_Main.1/1-201          | 170 LNL - EGLEHIAAFMQRMA - ERPEVQDALSAEGL - - K - - - - -                                                         | 201 |
| A9CII7_Main.1/1-208                 | 169 GTI - EKRPFTDYMAHLT - DRPAFKRAAQLDEE - - AAK - - - - -                                                        | 208 |
| A9CJU4_Main.1/1-219                 | 186 PLF - DAHPALKAWLARCQ - ARTAFKSMWDSRTA - - EAA - - - - -                                                       | 219 |
| A9CJU5_Main.1/1-206                 | 176 VDI - ARFPKVHDHFRMRN - DRPAVQRAL EGERG - - - - -                                                              | 206 |
| A9CLG1_Main.1/1-203                 | 168 AAT - PESDVVKAWI ERCG - ERPSLQWTANYDAC - - TVVAA - - - - -                                                    | 203 |
| Q7D3T0_Main.1/1-211                 | 178 IHF - DDLLNLRGWYERVK - ERDAVKQSILEEGL - - SL S - - - - -                                                      | 211 |
| 3C8E A_YghU_D6JFD2_Main.2/1-284     | 227 LDA - GSYKHVQRWAKEVG - ERPAVKRGRIVNRT - - NGP - LNEQLHERHDA SDFETNTEDKRQG - - - - -                           | 284 |
| 3GX0 A_YfcG_E7ICS5_Main.2/1-204     | 178 IDL - AMYPAVKNWHERIR - SRPATGQALL - - - - -                                                                   | 204 |
| 1G6W A_E7KHF2_Main.2/1-234          | 206 INIKIEFPEVYKWKHMM - RRPVAVIKALRG - - - - -                                                                    | 234 |
| 4ECI A_Q02KA8_Main.2/1-204          | 174 VAV - DGLDNLQRWIAAIE - ARPAVQRGLLVPRR - - - - -                                                               | 204 |
| 4IKH A_Q4KED9_Main.2/1-227          | 199 VGI - DNFPEVKRVLAKFV - ARPAVIRGLEIP - - - - -                                                                 | 227 |
| Q03L82_Main.2/1-262                 | 230 LDV - KEYKHLQAWTEKIA - NRPAVKRGLVEVEYK - - EI - - - - -                                                       | 262 |
| Q8DTN7_Main.2/1-263                 | 230 LAL - GTYQHLWDTERIA - QRPVAVKRAL EVDYK - - AIK - - - - -                                                      | 263 |
| A6B5E9_Main.2/1-285                 | 230 LDV - ESYKNVVRWAKAID - EREGVKRGRIVNRS - - WGE - EWEQLAERHSAVDIDNVL - - KLP - - - - -                          | 285 |
| Q2RXK8_Main.2/1-229                 | 177 QSL - DDFPNLKRWFDAIG - ARPAVQRGMALGAD - - LRE - ANANTTPEARAVLFGQKAR - - - - -                                 | 229 |
| Q4KH85_Main.2/1-213                 | 178 QKL - EDFPNLQRWFNSIQ - ARPATERAYALVEQ - - VNPAS - - - - -                                                     | 213 |
| 1EEM A_P78417_Main.3/1-237          | 187 ECV - DHTPKLKLWMAAMK - EDPTVSALLTSEKD - - WQGFLLELYLQN - - - - - SPEACDYGL - - - - -                          | 237 |
| P34345_Main.3/1-250                 | 200 PGE - EEPKLTkwfQKMI - SSDVVQSVTQSL E - - GA AFMNA YATH - - - - - QELNYDLGL - - - - -                          | 250 |
| Q2KDI2_Main.3/1-227                 | 176 G I F - AGLERVTRWR I ALG - ERRSVKDAVGEDY PQR LMEFLDKHESI - - - - - LLRLPAAA - - - - -                         | 227 |
| Q8XW81_Main.3/1-224                 | 178 P I F - EGLPRVKAWRAALG - ARESVI AAVGEDYAERFQGHRLRLHQAL - - - - - LAN - - - - -                                | 224 |
| Q9H4Y5_Main.3/1-243                 | 192 DCV - SHTPALRLWI SAMK - WDP TVC ALLMDKSI - - - - - FQGFLNLYFQN - - - - - NPNAFDF - - - - - GLC - - - - -      | 243 |
| Q9VSL2_Main.3/1-241                 | 192 FNE - SRFPK I TKWIALLK - ADSVVQSFYATPEQ - - HNEFWRTRKAG - - - - - NAN - YD LLA - - - - -                      | 241 |
| Q9VSL3_Main.3/1-243                 | 191 YDQ - SRFPQLTLWL ERMK - RDPAVMAFYMEAEV - - QAEFLRTRSLG - - - - - RPN - YNL - - - - - LVKDA - - - - -          | 243 |
| Q9VSL4_Main.3/1-250                 | 198 LDK - TRYQNL L KWRDLVA - QDEAVKATALDARI - - HAKFMKTRHEN - - - - - KPD - YDV - - - - - AFQPL - - - - -         | 250 |
| Q9VSL5_Main.3/1-251                 | 198 LDT - KRFEK L KWRDLMT - QDEVVQKTALDVQL - - HAEFQKSKTLG - - - - - NPQ - YDI - - - - - AFKGT - - - - -          | 251 |
| Q9VSL6_Main.3/1-254                 | 196 LSP - ERFP T L I KWRDLMI - QDRAVKCYLDGQT - - HAKYMN SRRSG - - - - - QAD - YNM - - - - - LYNEAKRVKLG - - - - - | 254 |
| 4HI7 A_B4KM86_Main.4/1-220          | 174 PVDAAKYPKL SAWI KRLE - QLPYYAENSTGAQQ - - FVAAVKSKPFT - - - - - VVGA - - - - -                                | 220 |
| 3R2Q A_B3HZI4_Main.9_NO_DSBR/1-202  | 173 GWX - VDRPHLVKL V ENLF - SRESFARTEPPKA - - - - -                                                              | 202 |
| A9CJG4_Main.9/1-198                 | 169 - EWAEGRDALAAWPETFG - KRFDAYAEMKAAA - - - - -                                                                 | 198 |
| 2R4V A_O15247_Main.10_NO_DSBR/1-226 | 185 DIP - AEFSGVWRYLHNAY - AREEFTHTCPEDKE - - IENTYANVAKQ - - - - -                                               | 226 |
| Q8LE52_Main.10/1-258                | 217 SVP - DSLPFVKS YMENVF - SRESFTNTRAETED - - VIAGWRPKVMG - - - - -                                              | 258 |
| Q9FRL8_Main.10/1-213                | 172 SVP - ESLTSVRN YAKALF - SRESFENTKAKKEI - - - - - VVAGWESKUNA - - - - -                                        | 213 |
| Q9FWR4_Main.10/1-213                | 172 SVP - ESFPHVHN YMKTLF - SLDSFEKT KTEEKY - - - - - VI SGWAPKVNP - - - - -                                      | 213 |
| Q88LB2_Main.14/1-199                | 172 - FAEAA YPRVRSWLEGL - ASELFKAIMVR - - - - -                                                                   | 199 |
| Q129E0_Main.14/1-230                | 194 - FTAQPWPR LQAWLAGFE - ASALYQSVMEKHAP - - WRA - ASE - - - - -                                                 | 230 |
| A9CKF2_Main.15/1-230                | 187 INW - LEAPI AKEWYQVRK - SRPSFRPFLSERIP - - RLAPSSH YADLDF - - - - -                                           | 230 |
| 2YCD A_A9CFJ9_Main.25/1-213         | 179 GIL - KDYGNL LAYVERGK - ARP AFKRAFDAQLA - - VFTA - - - - -                                                    | 213 |
| B8H2E2_Main.25/1-217                | 179 - - - AETPTLVAYRDRCT - ARP AFKALAAQLA - - DLN - - - - - GPPPPGWG - - - - -                                    | 217 |
| B7UV05_Main/1-220                   | 181 LDE - QRWPALAAHFARML - ERPAMQALLPGERR - - TLDKLA AKA - - - - -                                                | 220 |
| 1G7O A_B3BP81_R4.1/1-215            | 188 INW - - - PSRVADYRDNMA - - KQTQINL - - - - - LSSMAI - - - - -                                                 | 215 |
| D0W558_R4.1/1-213                   | 186 IEW - - - PQKVMGYLMTMS - - EKSGVPL - - - - - YFDRAL - - - - -                                                 | 213 |
| 3PPU A_YqjG_B3VQJ7_Xi.1/1-314       | 253 RTIRDGYPNLHRWMRKL YWGNPAFKDTCNFEHI - - KTH - YFWSHTF - - - - - INPHRIVP - - IGPIPDILPLD - - - - -             | 314 |
| 3R3E A_C4ZR18_Xi.1/1-308            | 243 HRIS - DYLN L YGFLRDIY - QMPGIAETVNFDHI - - RNH - YFRSHKT - - - - - INPTGIS - - IGPWQDLDEPHG - - - - -        | 303 |
| C7GXD4_Xi.1/1-370                   | 310 T SIRAGY PFIHLWVRNL YWN YDAFRYTTDFDHI - - KLH - YTRSHTR - - - - - INPLGITP - - LGPKPIDRPL - - - - -           | 370 |
| P48239_Xi.1/1-356                   | 293 KTI RDGFPYLHLWLNLYWN YAEFRFTTDFNHI - - KLF - YIRMEVSRNKINQFGIVP - - LGPKPDISRL - - - - -                      | 356 |
| Q04806_Xi.1/1-366                   | 306 ATIRDDYSRIHTWLN IYWRHEAFQRTTDFTHI - - KLG - YTRSQPR - - - - - VNPIGITP - - LGPKPIDIRPP - - - - -              | 366 |

|                                     |             |
|-------------------------------------|-------------|
| 1A0F A_E2KU21_Main.1/1-201          | - - - - -   |
| A9CII7_Main.1/1-208                 | - - - - -   |
| A9CJU4_Main.1/1-219                 | - - - - -   |
| A9CJU5_Main.1/1-206                 | - - - - -   |
| A9CLG1_Main.1/1-203                 | - - - - -   |
| Q7D3T0_Main.1/1-211                 | - - - - -   |
| 3C8E A_YghU_D6JFD2_Main.2/1-284     | - - - - -   |
| 3GX0 A_YfcG_E7ICS5_Main.2/1-204     | - - - - -   |
| 1G6W A_E7KHF2_Main.2/1-234          | - - - - -   |
| 4ECI A_Q02KA8_Main.2/1-204          | - - - - -   |
| 4IKH A_Q4KED9_Main.2/1-227          | - - - - -   |
| Q03L82_Main.2/1-262                 | - - - - -   |
| Q8DTN7_Main.2/1-263                 | - - - - -   |
| A6B5E9_Main.2/1-285                 | - - - - -   |
| Q2RXK8_Main.2/1-229                 | - - - - -   |
| Q4KH85_Main.2/1-213                 | - - - - -   |
| 1EEM A_P78417_Main.3/1-237          | - - - - -   |
| P34345_Main.3/1-250                 | - - - - -   |
| Q2KDI2_Main.3/1-227                 | - - - - -   |
| Q8XW81_Main.3/1-224                 | - - - - -   |
| Q9H4Y5_Main.3/1-243                 | - - - - -   |
| Q9VSL2_Main.3/1-241                 | - - - - -   |
| Q9VSL3_Main.3/1-243                 | - - - - -   |
| Q9VSL4_Main.3/1-250                 | - - - - -   |
| Q9VSL5_Main.3/1-251                 | - - - - -   |
| Q9VSL6_Main.3/1-254                 | - - - - -   |
| 4HI7 A_B4KM86_Main.4/1-220          | - - - - -   |
| 3R2Q A_B3HZI4_Main.9_NO_DSBR/1-202  | - - - - -   |
| A9CJG4_Main.9/1-198                 | - - - - -   |
| 2R4V A_O15247_Main.10_NO_DSBR/1-226 | - - - - -   |
| Q8LE52_Main.10/1-258                | - - - - -   |
| Q9FRL8_Main.10/1-213                | - - - - -   |
| Q9FWR4_Main.10/1-213                | - - - - -   |
| Q88LB2_Main.14/1-199                | - - - - -   |
| Q129E0_Main.14/1-230                | - - - - -   |
| A9CKF2_Main.15/1-230                | - - - - -   |
| 2YCD A_A9CFJ9_Main.25/1-213         | - - - - -   |
| B8H2E2_Main.25/1-217                | - - - - -   |
| B7UV05_Main/1-220                   | - - - - -   |
| 1G7O A_B3BP81_R4.1/1-215            | - - - - -   |
| D0W558_R4.1/1-213                   | - - - - -   |
| 3PPU A_YqjG_B3VQJ7_Xi.1/1-314       | - - - - -   |
| 3R3E A_C4ZR18_Xi.1/1-308            | 304 RD VR F |
| C7GXD4_Xi.1/1-370                   | - - - - -   |
| P48239_Xi.1/1-356                   | - - - - -   |
| Q04806_Xi.1/1-366                   | - - - - -   |
