# Supplementary material for: Large-Scale Determination of Sequence, Structure, and Function Relationships in Cytosolic Glutathione Transferases across the Biosphere
Source: PLoS Biol. 2014 Apr 22;12(4):e1001843. doi: 10.1371/journal.pbio.1001843 (PMC3995644; doi:10.1371/journal.pbio.1001843)
Supplement: Table S3 — Experimentally verified cytGST reaction types for each representative nodes in networks provided in this work. “Multiple reaction types in node” means that there is evidence for more than one reaction type in one or more member sequences in a representative node. (XLSX) [file pbio.1001843.s007.xlsx]

## Sheet: GOA_BRENDA_SOAP_ManLit_EFI_data
Table S3. Experimentally verified cytGST reaction types for each representative nodes in networks provided in this work
Subgroup in the SFLD	class annotation in nodea	representative sequence in node	number of sequences in node	multiple reaction types in node	nucleophilic aromatic substitution	nucleophilic substitution	conjugate addition	nucleophilic addition	epoxide ring opening	thiolysis	disulfide bond reductase	peroxidase	thiocyanate reductase	reductive dehalogenation	deglutathionylation	dehydroascorbate reductase	isomerization	hydrolytic dehalogenation	alkylarsenate reductase	other	biogically relevant reaction in node	experimental evidence sourceb
AMPS.1: Alpha-, Mu-, Pi-, and Sigma-like	Alpha	D3ZD94	118	✔	✔	✔	✔	✔	✔			✔					✔				✔	This work/Lit
AMPS.1: Alpha-, Mu-, Pi-, and Sigma-like	Mu	D3ZRV4	62	✔	✔	✔	✔		✔			✔					✔					Lit
AMPS.1: Alpha-, Mu-, Pi-, and Sigma-like	Mu	P56598	14	✔	✔		✔					✔										Lit
AMPS.1: Alpha-, Mu-, Pi-, and Sigma-like	Mu	Q26513	7	✔	✔		✔					✔										Lit
AMPS.1: Alpha-, Mu-, Pi-, and Sigma-like	Mu	Q59EJ5	63		✔																	Lit
AMPS.1: Alpha-, Mu-, Pi-, and Sigma-like	Pi	E1FK96	11	✔	✔		✔					✔										Lit
AMPS.1: Alpha-, Mu-, Pi-, and Sigma-like	Pi	F1PYJ1	24	✔	✔	✔	✔	✔														Lit
AMPS.1: Alpha-, Mu-, Pi-, and Sigma-like	Pi	O61750	3	✔	✔			✔				✔										Lit
AMPS.1: Alpha-, Mu-, Pi-, and Sigma-like	Pi	Q9W647	14	✔	✔	✔	✔	✔				✔										Lit
AMPS.1: Alpha-, Mu-, Pi-, and Sigma-like	Sigma	A8WUQ1	20	✔	✔															✔	✔	Lit
AMPS.1: Alpha-, Mu-, Pi-, and Sigma-like	Sigma	B5XAT3	10	✔	✔	✔	✔	✔				✔									✔	Lit
AMPS.1: Alpha-, Mu-, Pi-, and Sigma-like	Sigma	D7S008	15	✔	✔		✔			✔												Lit
AMPS.1: Alpha-, Mu-, Pi-, and Sigma-like	Sigma	E3M443	31	✔	✔	✔	✔	✔				✔										This work/Lit
AMPS.1: Alpha-, Mu-, Pi-, and Sigma-like	Sigma	P46436	7	✔	✔		✔					✔										Lit
AMPS.1: Alpha-, Mu-, Pi-, and Sigma-like	Sigma	Q28XE0	17	✔	✔	✔	✔		✔			✔										Lit
AMPS.1: Alpha-, Mu-, Pi-, and Sigma-like		B5L7D7	5		✔																	Lit
AMPS.1: Alpha-, Mu-, Pi-, and Sigma-like		B6RB02	1	✔	✔		✔															Lit
AMPS.1: Alpha-, Mu-, Pi-, and Sigma-like		Q0P7I5	1		✔																	Lit
AMPS.1: Alpha-, Mu-, Pi-, and Sigma-like		Q19BK1	4	✔	✔		✔															Lit
AMPS.1: Alpha-, Mu-, Pi-, and Sigma-like		Q3ZJN3	1	✔	✔		✔					✔										Lit
AMPS.1: Alpha-, Mu-, Pi-, and Sigma-like		Q8ISK1	4	✔	✔		✔															Lit
AMPS.1: Alpha-, Mu-, Pi-, and Sigma-like		Q8MU52	6	✔	✔		✔															Lit
AMPS.1: Alpha-, Mu-, Pi-, and Sigma-like		Q8MWS0	4	✔	✔		✔															Lit
Main.1: Beta-like	Beta	B5SGD9	45	✔	✔						✔			✔							✔	Lit
Main.1: Beta-like	Beta	C4IUM4	17	✔	✔							✔										Lit
Main.1: Beta-like	Beta	F2ET59	56		✔																	Lit
Main.1: Beta-like		A2W009	156									✔										This work
Main.1: Beta-like		A2W152	16	✔	✔	✔	✔	✔			✔	✔				✔					✔	Lit
Main.1: Beta-like		A3VZL1	24					✔														This work
Main.1: Beta-like		A4ESV0	26			✔																This work
Main.1: Beta-like		A7IHH3	7					✔														This work
Main.1: Beta-like		A9CLG1	6	✔	✔	✔	✔	✔			✔	✔				✔					✔	Lit
Main.1: Beta-like		A9EQL0	46		✔																	This work
Main.1: Beta-like		B4W749	35	✔	✔	✔	✔	✔			✔	✔				✔					✔	This work/Lit
Main.1: Beta-like		B8H1G0	30		✔																	This work
Main.1: Beta-like		C4WK92	24	✔	✔	✔	✔	✔			✔	✔				✔					✔	This work/Lit
Main.1: Beta-like		C5CZV6	22		✔																	Lit
Main.1: Beta-like		C5DP27	8	✔	✔		✔															Lit
Main.1: Beta-like		C9XZZ3	28			✔																This work/Lit
Main.1: Beta-like		D0S2U7	20									✔										This work
Main.1: Beta-like		D5ANC5	8	✔	✔	✔	✔	✔			✔	✔				✔					✔	This work/Lit
Main.1: Beta-like		D8UG08	4	✔	✔	✔		✔														Lit
Main.1: Beta-like		E0FBF3	7							✔												This work
Main.1: Beta-like		E4RHU3	10	✔		✔												✔				This work
Main.1: Beta-like		Q086X4	22	✔		✔		✔														This work
Main.1: Beta-like		Q3K8I5	38			✔																This work
Main.1: Beta-like		Q5ZU99	5		✔																	Lit
Main.1: Beta-like		Q8DMB4	3	✔	✔	✔	✔	✔	✔			✔										Lit
Main.1: Beta-like		Q9P6M1	1	✔	✔							✔										Lit
Main.2: Nu-like	Nu	A2XRJ6	57	✔							✔	✔										Lit
Main.2: Nu-like	Nu	A4YR60	349	✔		✔					✔	✔										This work/Lit
Main.2: Nu-like		A3NN88	116					✔														This work
Main.2: Nu-like		A5V6W1	17								✔											This work
Main.2: Nu-like		O59827	6	✔	✔	✔																This work/Lit
Main.2: Nu-like		Q0V6Z4	30								✔											This work
Main.2: Nu-like		Q2SVY8	182	✔							✔	✔										This work
Main.2: Nu-like		Q54B85	2											✔							✔	Lit
Main.2: Nu-like		Q5B875	16			✔																This work
Main.2: Nu-like		Q5H2P6	25			✔																This work
Main.2: Nu-like		Q8NJR4	29	✔							✔									✔	✔	Lit
Main.2: Nu-like		Q9RBP3	18	✔	✔						✔									✔	✔	This work/Lit
Main.3: Omega- and Tau-like	Omega	E3ML07	3	✔	✔						✔	✔				✔					✔	Lit
Main.3: Omega- and Tau-like	Omega	F1PUM3	58	✔	✔		✔			✔	✔					✔			✔		✔	Lit
Main.3: Omega- and Tau-like	Tau	A2Z9M1	68		✔																	Lit
Main.3: Omega- and Tau-like	Tau	B8BGH1	47		✔																	Lit
Main.3: Omega- and Tau-like	Tau	D7KVA3	87	✔	✔		✔	✔		✔												Lit
Main.3: Omega- and Tau-like	Tau	Q9LFX4	18	✔	✔			✔				✔										Lit
Main.3: Omega- and Tau-like		A2YL42	20		✔																	Lit
Main.3: Omega- and Tau-like		A5BAG0	38	✔	✔			✔														This work
Main.3: Omega- and Tau-like		B4N5A8	31	✔							✔					✔				✔	✔	Lit
Main.3: Omega- and Tau-like		B4QM36	5	✔							✔					✔					✔	Lit
Main.3: Omega- and Tau-like		C5XHF5	11					✔														This work
Main.3: Omega- and Tau-like		C5YMG7	19		✔																	Lit
Main.3: Omega- and Tau-like		D7SK64	80					✔														This work
Main.3: Omega- and Tau-like		D7TQU2	7	✔	✔							✔										Lit
Main.3: Omega- and Tau-like		F0BGL4	14								✔											This work
Main.3: Omega- and Tau-like		Q2F5R1	4	✔	✔		✔			✔												Lit
Main.3: Omega- and Tau-like		Q7K206	33	✔	✔						✔					✔					✔	Lit
Main.4: Theta-like	Theta	B0W6B0	124	✔	✔	✔	✔					✔								✔	✔	Lit
Main.4: Theta-like	Theta	B2R533	20	✔	✔	✔	✔	✔	✔			✔						✔				Lit
Main.4: Theta-like	Theta	D2A369	31	✔	✔		✔			✔		✔										Lit
Main.4: Theta-like	Theta	D2HRC7	6	✔	✔	✔		✔	✔	✔		✔						✔				Lit
Main.4: Theta-like	Theta	Q29QF9	39	✔	✔							✔										Lit
Main.4: Theta-like		A6MN06	1		✔																	Lit
Main.4: Theta-like		B3NMS3	64	✔	✔			✔		✔	✔											This work
Main.4: Theta-like		B4KJV1	11	✔	✔	✔		✔		✔												This work
Main.4: Theta-like		B6V6F7	11	✔		✔												✔			✔	This work/Lit
Main.4: Theta-like		C1C0Z1	10	✔	✔	✔	✔															This work
Main.4: Theta-like		Q2YFE7	6		✔																	Lit
Main.4: Theta-like		Q8MUQ7	9		✔																	Lit
Main.5: Phi-like	Phi	A2WYR9	13		✔																	Lit
Main.5: Phi-like	Phi	B2D2J8	39	✔	✔							✔										Lit
Main.5: Phi-like	Phi	C5Z027	18		✔																	Lit
Main.5: Phi-like	Phi	C6T9P9	20		✔																	Lit
Main.5: Phi-like	Phi	O24261	21		✔																	Lit
Main.5: Phi-like	Phi	P30111	23		✔																	Lit
Main.5: Phi-like	Phi	Q96266	50	✔	✔				✔			✔										This work/Lit
Main.5: Phi-like		E1TFC5	7					✔														This work
Main.6		A2W0X8	28		✔																	Lit
Main.6		C8WB28	2			✔																This work
Main.6		E1VLK3	11							✔												This work
Main.7		B2AEM8	3		✔																	This work
Main.7		Q2UH62	3	✔	✔	✔																This work
Main.8: Zeta-like	Zeta	A6QXL4	27														✔				✔	Lit
Main.8: Zeta-like	Zeta	C3ZQH3	31	✔	✔	✔	✔			✔		✔					✔	✔			✔	Lit
Main.8: Zeta-like	Zeta	D7TGI8	56	✔	✔												✔				✔	Lit
Main.8: Zeta-like		C6B0Q1	5									✔										This work
Main.8: Zeta-like		D0LRN0	9			✔																This work
Main.8: Zeta-like		D4Z7Q4	16			✔																This work
Main.8: Zeta-like		D5T7F6	4											✔								This work
Main.8: Zeta-like		E8F894	54			✔																This work
Main.8: Zeta-like		Q5P739	35														✔				✔	Lit
Main.9		B1M0X3	1			✔																This work
Main.9		C0YB19	86			✔																This work
Main.9		Q2RP79	1			✔																This work
Main.9		Q3K5M5	22							✔												This work
Main.9		Q984P7	18	✔	✔	✔	✔	✔			✔	✔				✔					✔	Lit
Main.9		Q9CLV2	21	✔		✔		✔														This work
Main.10		C5YYX2	39	✔							✔					✔					✔	Lit
Main.10		D7M874	71	✔							✔					✔					✔	Lit
Main.10		P35526	61																	✔	✔	Lit
Main.10		Q96NY7	50																	✔	✔	Lit
Main.12		E6WX98	36									✔										This work
Main.12		F0BFS8	11											✔								This work
Main.12		Q0C5X7	1			✔																This work
Main.13		C4K5S2	154																	✔	✔	Lit
Main.14		D4ZLL1	34								✔											This work
Main.14		Q129E0	8								✔											This work
Main.14		Q31IT0	4			✔																This work
Main.15		B6JCL2	92	✔	✔	✔	✔	✔			✔	✔				✔					✔	Lit
Main.15		E8RLK4	9											✔								This work
Main.16		B0XYK1	11			✔																This work
Main.17		A8HK55	70											✔								This work
Main.18		A7MH37	88	✔	✔							✔										Lit
Main.19		B2JJD7	53	✔		✔		✔														This work
Main.20		Q1I313	10							✔												This work
Main.20		Q63VK7	37			✔																This work
Main.22	Theta	C3KHZ4	39		✔																	Lit
Main.25		A9CFJ9	33	✔	✔	✔	✔	✔			✔	✔				✔					✔	This work/Lit
Main.25		B8H2E2	4	✔	✔						✔											This work
Main.28		E1CJ68	3			✔															✔	Lit
Main.28		Q6N1R4	12	✔	✔	✔		✔														This work
R1.1		Q9RBP4	3						✔												✔	Lit
R4.1		C9Y0X5	55								✔											Lit
R4.1		E0N704	30								✔											This work
Xi.1	Xi	Q1MDI4	322	✔							✔				✔							This work
Xi.1	Xi	Q5BBA6	83	✔							✔				✔	✔					✔	Lit
Xi.1	Xi	Q5UZX8	66												✔						✔	Lit
Xi.1		A7TQ30	6	✔			✔				✔				✔	✔			✔		✔	Lit
Xi.1		E7KP07	6	✔			✔				✔					✔			✔		✔	Lit
Xi.1		E7KT07	11	✔			✔				✔					✔			✔		✔	Lit
No subgroup specified		A1U3L8	6	✔		✔		✔														This work
No subgroup specified		A5E0V2	1			✔																This work
No subgroup specified		C0VL10	15	✔				✔				✔										This work
No subgroup specified		E0LP85	2											✔							✔	Lit
No subgroup specified		E5A5P4	10					✔													✔	Lit
No subgroup specified		F0XQV7	19			✔																This work
No subgroup specified		F2N3Z0	10								✔											This work
No subgroup specified		P30347	2			✔															✔	Lit
No subgroup specified		Q5A0X5	7				✔															This work
No subgroup specified		Q9WXJ9	2												✔						✔	Lit
aClasses are canonical cytGST classes from Swiss-Prot annotations and from the literature for Nu and Xi.
bLit = from the literature.
